# Supplementary material for: New insights into the eastern subpolar North Atlantic meridional overturning circulation from OVIDE
Source: Copernicus journal article supplement (doi:10.5194/os-20-779-2024), 2024-06-14
Supplement: Supplementary file 2 [file os-20-779-2024-supplement.zip]

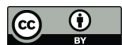

*Supplement of*

## **New insights into the eastern subpolar North Atlantic meridional overturning circulation from OVIDE**

**Herlé Mercier et al.**

*Correspondence to:* Herlé Mercier ([herle.mercier@ifremer.fr](mailto:herle.mercier@ifremer.fr))

- [os-20-779-2024-supplement-title-page.pdf](#)
- [egusphere\\_2024\\_388\\_moc\\_time\\_series.nc](#)
- [subpolar\\_moc\\_supplementary\\_figures\\_2024\\_04\\_09\\_no\\_changes.pdf](#)

The copyright of individual parts of the supplement might differ from the article licence.
